# Supplementary material for: Exploring network structure and the role of key stakeholders to understand the obesity prevention system in an Australian metropolitan health service: study protocol
Source: PubMed Central journal article supplement — BMJ Open. 2019 May 24;9(5):e027948. doi: 10.1136/bmjopen-2018-027948 (PMC6537969; doi:10.1136/bmjopen-2018-027948), 2019-05-24
Supplement: bmjopen-2018-027948.draft_revisions.pdf [file bmjopen-2018-027948.draft_revisions.pdf]

# BMJ Open

BMJ Open is committed to open peer review. As part of this commitment we make the peer review history of every article we publish publicly available.

When an article is published we post the peer reviewers' comments and the authors' responses online. We also post the versions of the paper that were used during peer review. These are the versions that the peer review comments apply to.

The versions of the paper that follow are the versions that were submitted during the peer review process. They are not the versions of record or the final published versions. They should not be cited or distributed as the published version of this manuscript.

BMJ Open is an open access journal and the full, final, typeset and author-corrected version of record of the manuscript is available on our site with no access controls, subscription charges or pay-per-view fees (<http://bmjopen.bmj.com>).

If you have any questions on BMJ Open's open peer review process please email [info.bmjopen@bmj.com](mailto:info.bmjopen@bmj.com)

# BMJ Open

## Exploring network structure and the role of key stakeholders to understand the obesity prevention system in an Australian metropolitan health service: study protocol

|                               |                                                                                                                                                                                                                                                                                                                                                                                                                                                                                                                                                                                                                               |
|-------------------------------|-------------------------------------------------------------------------------------------------------------------------------------------------------------------------------------------------------------------------------------------------------------------------------------------------------------------------------------------------------------------------------------------------------------------------------------------------------------------------------------------------------------------------------------------------------------------------------------------------------------------------------|
| Journal:                      | <i>BMJ Open</i>                                                                                                                                                                                                                                                                                                                                                                                                                                                                                                                                                                                                               |
| Manuscript ID                 | bmjopen-2018-027948                                                                                                                                                                                                                                                                                                                                                                                                                                                                                                                                                                                                           |
| Article Type:                 | Protocol                                                                                                                                                                                                                                                                                                                                                                                                                                                                                                                                                                                                                      |
| Date Submitted by the Author: | 15-Nov-2018                                                                                                                                                                                                                                                                                                                                                                                                                                                                                                                                                                                                                   |
| Complete List of Authors:     | Jancey, Jonine; Curtin University, School of Public Health<br>Blackford, Krysten; Curtin University, School of Public Health<br>Pollard, Christina; East Metropolitan Health Service<br>Leavy, Justine ; Curtin University, School of Public Health<br>Riley, Therese; Sax Institute, The Australian Prevention Partnership Centre<br>Szybiak, Maria; Cancer Council Western Australia; Heart Foundation Western Australia<br>Milligan, Megan; East Metropolitan Health Service<br>Chamberlain, Dan; Sax Institute, The Australian Prevention Partnership Centre; La Trobe University, School of Psychology and Public Health |
| Keywords:                     | obesity prevention, systems thinking, health promotion, social network analysis                                                                                                                                                                                                                                                                                                                                                                                                                                                                                                                                               |
|                               |                                                                                                                                                                                                                                                                                                                                                                                                                                                                                                                                                                                                                               |

SCHOLARONE™  
Manuscripts

1  
2  
3 **Title:** Exploring network structure and the role of key stakeholders to understand the obesity  
4 prevention system in an Australian metropolitan health service: study protocol.  
5  
6  
7

8 **Authors:** Jonine Jancey<sup>1,2</sup>, Krysten Blackford<sup>1,2\*</sup>, Christina Pollard<sup>3</sup>, Justine E Leavy<sup>1,2</sup>, Therese Riley<sup>4</sup>,  
9 Maria Szybiak<sup>5,6</sup>, Megan Milligan<sup>3</sup>, Dan Chamberlain<sup>4,7</sup>  
10  
11  
12

13 \*Corresponding author: Krysten Blackford, GPO Box U1987, Perth WA 6845,  
14

15 [k.blackford@curtin.edu.au](mailto:k.blackford@curtin.edu.au), +61892662751  
16

- 17 1. School of Public Health, Curtin University, Perth, Australia.
- 18 2. Collaboration for Evidence, Research and Impact in Public Health, Curtin University, Perth,  
19 Australia.
- 20 3. East Metropolitan Health Service, Perth, Australia.
- 21 4. The Australian Prevention Partnership Centre, Sax Institute, Haymarket, Australia.
- 22 5. Heart Foundation Western Australia, Subiaco, Australia.
- 23 6. Cancer Council Western Australia, Subiaco, Australia.
- 24 7. School of Psychology and Public Health, La Trobe University, Melbourne  
25  
26  
27  
28  
29  
30

31 **Word count:** 2,643  
32  
33  
34  
35  
36  
37  
38  
39  
40  
41  
42  
43  
44  
45  
46  
47  
48  
49  
50  
51  
52  
53  
54  
55  
56  
57  
58  
59  
60

## ABSTRACT

### Introduction

Little progress has been made to address the increasing obesity prevalence over the past few decades, with growing concern about the far-reaching consequences for health and wellbeing related to obesity on a global scale. Systems thinking is emerging as an approach to obesity prevention, as it allows health researchers, practitioners and policy-makers to systematically synthesise existing data, expose gaps, inform priority setting, and identify leverage points in the system. The aim of this study is to trial a collaborative systems thinking approach to better understand the local obesity prevention system, and identify gaps and viable opportunities for health promotion activities to strengthen obesity prevention efforts in an Australian metropolitan health service.

### Methods and analysis

A mixed methods design will be undertaken in a metropolitan health service area in Perth, Western Australia. A systems inventory audit will be used to identify physical activity, nutrition and overweight/obesity prevention activities taking place in the study area. An organisational network survey will be administered, and a social network analysis undertaken. Parameters including density, centrality and betweenness centrality will be computed and compared using UCINET and Netdraw.

### Ethics and dissemination

Ethics approval has been obtained from the Curtin University Human Research Ethics Committee (approval number HRE2017-0862). Results will be reviewed with members of a Research Advisory Group, submitted to relevant journals, and presented at relevant conferences to health promotion practitioners and policymakers. The area health service, as co-producers of the research, will use findings to inform policy and strategy across the study area.

### Keywords

Obesity prevention; systems thinking; health promotion; social network analysis

**ARTICLE SUMMARY****Strengths and limitations of this study**

- The research will identify obesity prevention programs, collaborations and interactions in the system, to help identify gaps in the system and directly inform decision making processes to strengthen obesity prevention efforts.
- The quality of data will depend on the willingness of participants and organisations in the study area to share information.
- The co-production approach addresses the usual gap between research, policy makers and practitioners' needs, creating timely, real-world outcomes.
- The suitability of this process will be evaluated for duplication and translation into other priority areas for health services and local government (e.g. tobacco control; alcohol harm reduction).

## INTRODUCTION

### Health Issue

The prevalence of obesity is increasing globally, with Australia recording some of the highest rates in the world. In 2014–15, approximately 63% of Australian adults were overweight or obese, which is equivalent to approximately 11 million people(1). Little progress has been made to address the issue over the past few decades, with growing concern about the far-reaching consequences for health and wellbeing(2).

As the prevalence of overweight and obesity increases, health and welfare costs will increase substantially(3). The financial consequences for the individual and the health care system, the associated economic burden will adversely impact workplace productivity, participation in workplace and domestic activities, and economic growth(4). In 2010, the direct costs associated with obesity and associated chronic disease in Australia was calculated to be \$21 billion annually and indirect costs \$35.6 billion, deriving an overall annual cost of \$56.6 billion(5). This ever increasing annual cost further escalates obesity as a public health priority and highlights the need for effective and comprehensive prevention efforts(6).

Obesity is a “complex problem” and innately challenging. Complex problems, unlike simple problems whereby outcomes of actions are linear and can be predicted, involve multiple actors and requires multiple interventions that go beyond the focus of personal responsibility(7). Halting and reversing obesity both in Australia and globally will require changing our societal approach to food, beverages, and physical activity(2), which are part of complex systems that include food supply, communications, transport, urban design, business, socio-cultural, education, health, trade, economic, governance, urban design, and marketing systems(8). Understanding these complexities has supported the emergence of systems thinking as an obesity prevention approach(9, 10).

### Systems Thinking

To address the problem of obesity, it is imperative to understand the community system in which it occurs, and implement health promotion interventions that contain coordinated interconnected components that consider physical, biological, ecological, social, political and organisational relationships(11). Accordingly, systems thinking recognises the characteristics of these relationships and emphasises the nonlinear, dynamic and adaptive nature of the overall system(12). Systems thinking methodologies allow researchers and decision-makers to examine a system in terms of its components and interactions between those components at multiple levels, to assist with planning appropriate interventions(13, 14).

1  
2  
3 Systems thinking was introduced to the public health field to address a wide range of health  
4 problems(13), having been used in other disciplines, such as physics, economics, engineering, and  
5 systems biology(15). A major reason for the recent adoption of systems thinking in health promotion  
6 is the growing recognition of its ability to inform investments and actions that address complex  
7 problems in specific domains (e.g., neighbourhood effects on health and obesity). Often there are a  
8 number of similar programs and activities operating simultaneously within a community,  
9 coordinated and funded by an array of organisations and funding bodies. Therefore, the systems  
10 thinking approach provides health researchers, practitioners and policy-makers with the tools to  
11 systematically synthesise existing data, expose gaps, inform priority setting, and identify leverage  
12 points in the system(15-17).

### 21 **Western Australian Context**

22 The Western Australian (WA) Health Promotion Strategic Framework(18) is a State Government  
23 framework which adopts a whole-of-population approach to addressing obesity, with identified  
24 targeted interventions aimed at reducing health inequalities in communities who have a high  
25 prevalence of the associated chronic disease risk factors. The WA Department of Health has  
26 developed a five-year plan to curb the rise of overweight and obesity in the WA population and has  
27 highlighted the need for interventions to take a comprehensive approach to prevention(18). In  
28 support of this comprehensive approach, a large and newly formed Health Service in metropolitan  
29 Perth, Western Australia (WA) has been established, with the primary aim of maintaining and  
30 improving the health and wellbeing of more than 725,000 residents across 13 local government  
31 areas by adopting a systems thinking approach to health promotion.

32 There is lack of information regarding the organisations and networks that operate within the area  
33 health service to address obesity, physical activity and nutrition to improve long term health  
34 outcomes. Using a collaborative approach and systems thinking informed methods previously  
35 trialled in a range of communities across Australia(19), a partnership between a university, non-  
36 government organisation and government department was established to deliver this project. This  
37 collaborative research aims to better understand the obesity prevention system located in a  
38 metropolitan area of WA. The project will identify community organisations, existing programs,  
39 services and collaborations, to enable the area health service to understand gaps in the system. This  
40 will directly inform the health promotion policy, practice, investment and broader decision-making  
41 processes.

### 57 **METHODS AND ANALYSIS**

1  
2  
3 This mixed methods study comprises three phases. It will explore the boundaries, networks and  
4 actions of the local obesity prevention system in the study area, which includes the thirteen Local  
5 Government Areas (LGAs) that comprise the area health service. The study design is based on  
6 previous works(20-22) and methods undertaken in Australia(23, 24).  
7  
8  
9

### 10 **Primary aim**

11 This exploratory research will trial a collaborative systems thinking approach to better understand  
12 the local obesity prevention system in an area health service, and identify gaps and viable  
13 opportunities for health promotion investments to improve obesity prevention efforts and actions.  
14  
15  
16  
17

### 18 **Research objectives**

- 19 • Describe the chronic disease and health risks profile relevant to overweight/obesity for the  
20 study population (Phase 1).  
21
- 22 • Identify local physical activity, nutrition and overweight/obesity prevention activities taking  
23 place in the study area (Phase 2).  
24
- 25 • To identify the most influential stakeholders, collaborations and activities within the study  
26 area, and identify opportunities to support these actions or identify potential system  
27 improvements (Phase 3).  
28  
29  
30  
31  
32

### 33 **Advisory Group**

34 An Advisory Group comprising the Research Team and selected experts in obesity prevention will be  
35 formed in the early stages of the project. The Research Team will identify and invite experts in  
36 relevant health promotion policy and practice, including relevant stakeholders and practitioners with  
37 current practice expertise in health promotion, non-government organisations, local government,  
38 and Aboriginal and Torres Strait Islander issues and health promotion practitioners to join the  
39 Advisory Group. The group will meet on a quarterly basis to: identify relevant stakeholders and  
40 potential collaborators; review research instruments as required; consider findings and provide  
41 feedback; and make recommendations for research translation.  
42  
43  
44  
45  
46  
47  
48

### 49 **Phase 1: LGA profiling**

#### 50 *Aim*

51 To describe the context of the study area by identifying chronic disease and risk factor prevalence  
52 relevant to overweight/obesity for each LGA in the study area.  
53  
54

#### 55 *Method*

56 The Research Team and Advisory Group will outline the scope and nature of the health profiles of  
57 the 13 LGAs. The Health Services health promotion team will develop a set of health profile  
58  
59  
60

1  
2  
3 indicators which will be collated from Departmental monitoring systems and other sources. All data  
4 will be provided to the Advisory Group and Research Team for use in Phase 2.  
5

## 6 7 **Phase 2: System Inventory**

### 8 *Aim*

9  
10 To identify current physical activity, nutrition and overweight/obesity prevention activities taking  
11 place in the study area. These data will be used to refine the approach to Phase 3.  
12  
13

### 14 *Method*

15  
16 The System Inventory method(23, 24) will be adapted by the Research Team for the study area. The  
17 inventory will capture a comprehensive list of the key organisations that contribute to prevention  
18 efforts across the study area.  
19  
20

### 21 *Participants and sampling*

22  
23 Participants will include health promotion practitioners, policy makers and other health  
24 professionals involved in the delivery of physical activity, nutrition and obesity prevention programs  
25 and activities in the study area. The Advisory Group and six Health Promotion Officers employed by  
26 the area health service will initially identify key organisations and individuals. All potential  
27 organisations will be sent a letter inviting them to participate in a face-to-face interview with a  
28 Health Promotion Officer. Interested participants will be provided with a study information sheet,  
29 and informed written consent will be obtained prior to the interview commencing. To ensure that all  
30 relevant individuals are included, a referral sampling technique will be used whereby participants  
31 can nominate other relevant stakeholders and individuals involved in physical activity, nutrition or  
32 obesity prevention in the study area(25).  
33  
34  
35  
36  
37  
38  
39

### 40 *Data collection*

41  
42 A custom-built database will be designed using Microsoft Access software to record details of  
43 prevention activities being employed in the study area. The content of the database will be based on  
44 the Systems Inventory instrument, and the database will be reviewed by the Research Team to  
45 confirm face and content validity. It will then be trialled with health professionals (n=10) and  
46 changes made as required. The final instrument will then be reviewed and trialled by the Health  
47 Promotion Officers (n=6) for usability, suitability and comprehension. Training workshops for the  
48 Health Promotion Officers on data collection and use of the database will be conducted.  
49  
50  
51  
52

53  
54 The database will capture information for each activity/program delivered by participants and the  
55 organisations they represent. The inventory will include information on the: organisation type;  
56 contact information; overarching program objectives and strategies; types of activities implemented  
57  
58  
59  
60

(physical activity, nutrition, and obesity prevention); activity duration; collaborating partners; target population; settings/locations the program/activity operates; program evaluation; and program funding details. Activities will be included in the system inventory if they are: a) a current intervention strategy (policy/regulation or program); b) conducted in or reach the study area; c) comprise more than one activity session; d) population-based; and e) aimed at obesity prevention, specifically nutrition, physical activity, and/or overweight/obesity prevention. Activities will be excluded if they are: a) delivered by alternative therapists based on Australian Health Practitioner Regulation Agency(26) guidelines; b) pharmacological interventions (special purpose dietary supplements); c) one-on-one interventions/practitioners delivering individually focused programs; and d) not comprising a core component (at least 75%) focusing on nutrition, physical activity, or overweight/obesity prevention. These data items will collectively make up the inventory of obesity prevention activities in the study area.

#### *Data analysis*

Descriptive statistics will be used to summarise the Systems Inventory data for the study area. All statistical analyses will be performed using SPSS Statistics Package 25(27). Results will inform Phase 3.

### **Phase 3: Organisational network survey**

#### *Aim*

To identify the most influential stakeholders, collaborations and activities within the study area, and identify opportunities to support these actions or identify potential system improvements.

#### *Method*

An online organisational network survey will be undertaken to assess the degree of interrelatedness between a sub-sample of organisations identified during Phase 2. The survey has been previously developed and trialled(28, 29) and will be adapted for the current context. Interpersonal relationships will be captured via quantitative methods and analysed to provide a visual representation of the network structure in terms of interactions, activities and collaborations between organisations within the system.

#### *Participants and sampling*

Key decision-makers from a range of organisations will be sampled from the inventory produced during Phase 2. It is anticipated that approximately 30 key agencies within the study area will be identified, which is based on the previous work(23, 24). Researchers will initially make telephone contact with the identified stakeholders to inform them of the research aim, and participants will be provided with a link to the survey. Participants will provide informed consent prior to commencing.

1  
2  
3 If after one week there has been no response researchers will follow-up via telephone and offer  
4 assistance to complete the survey.  
5

#### 6 7 *Data collection*

8  
9 Data will be collected via an online survey using Qualtrics(30), which will examine the relationships  
10 between organisations in the area health service that were identified in Phase 2. Participants will be  
11 asked to identify the organisations with which they: share information, knowledge, or resources;  
12 engage in joint planning; apply for joint funding; and share informal contacts. Participants will be  
13 asked to choose from a list of possible responses, and will have the opportunity to expand on their  
14 responses using open-ended textboxes.  
15  
16  
17  
18

#### 19 20 *Data analysis*

21 Data will be analysed using social network analysis (SNA), which is used to explain social phenomena  
22 using features of the network involved. SNA explores the structures and processes of a network,  
23 which may constitute individuals or organisations (actors) that are linked by ties to one another(31).  
24 This type of analysis focuses on relationships within a network rather than studying the attributes of  
25 individuals or organisations that comprise the network(31). Its analysis can identify what ties actors  
26 have and whether they are informal (an organisation is known to another organisation), or formal  
27 (funding or joint-partnership of service delivery)(32). Understanding the types and functions of  
28 networks(32) and what role key actors play is essential to understand if, where, and how to  
29 intervene in a system.  
30  
31  
32  
33  
34  
35

36  
37 Data will be mapped and analysed using UCINET 6 for Windows(33) and Netdraw software(34). Links  
38 between actors will be mapped, and analysis will examine the role of actors in the network relative  
39 to others by plotting the network's centrality scores. Central actors will be identified by degree  
40 centrality (most connected within the network), closeness centrality (connecting quickly to the  
41 whole network), and betweenness centrality (strategically placed in the network)(35, 36).  
42  
43  
44

45 Demographic data will also be used to determine the basis of clustering. This will enable the  
46 identification of potential organisational collaborations, and gaps in the service delivery system  
47 across the study area. Actors will be de-identified for presentation. The data will be available on  
48 contact when the researchers have agreed analysis is complete.  
49  
50  
51

#### 52 53 **ETHICS AND DISSEMINATION**

54 Ethics approval has been obtained from the Curtin University Human Research Ethics Committee  
55 (Approval Number HREC2017-0862). A coordinated knowledge exchange via Advisory Committee  
56 and research agencies will be undertaken as part of the dissemination strategy. The research plan  
57 utilises push / pull knowledge exchange strategies to clearly describe how the findings are promoted  
58  
59  
60

1  
2  
3 and used. Push/pull knowledge translation in public health refers to the dissemination efforts by  
4 researchers (push) and the potential for limitation in its momentum by policymaker and practitioner  
5 motivation and capability (pull)(37). The push-pull framework will be used to guide community  
6 engagement and appropriate dissemination as outlined below.  
7  
8  
9

#### 10 *Push strategy*

11  
12 It is intended that quarterly policy and action briefs for relevant stakeholders will be developed in  
13 partnership with the project Advisory Group (including representation from area health service and  
14 health promotion management, non-government organisations, health promotion officers, LGA and  
15 program representatives) to provide an overview of the project, process findings and  
16 recommendations. Targeted presentations and skill building activities will be brokered; for example,  
17 stakeholder workshops to discuss findings, the delivery of agency-related conference presentations.  
18 Key findings will be prepared for dissemination and communicated appropriately to relevant  
19 stakeholders in government, non-government and community organisations. This may include using  
20 agency-specific communication methods through newsletters, social media, online and website  
21 advertising and content, as well as seminars as appropriate. Peer reviewed journal articles and fact  
22 sheets will be made available to build the capacity of the professional workforce in health, public  
23 health, government and non-government agencies, as well as the broader general community.  
24 Research reports will be made available through the research organisation websites, and potential  
25 replication and duplication of processes and uptake of findings will be supported.  
26  
27  
28  
29  
30  
31  
32  
33  
34  
35

#### 36 *Pull strategy*

37  
38 A key strength in the program design is the utilisation of knowledge brokers (stakeholder managers  
39 and researchers) and program champions (health promotion officers, local government staff and/or  
40 other relevant stakeholders) which will help build capacity in professional workforce for the  
41 purpose, use and implementation of systems thinking tools and processes and social network  
42 analysis in Western Australia. Although this current research focuses on the priority areas of  
43 nutrition, physical activity and overweight/obesity prevention, one of the aims of undertaking a  
44 prevention systems methodological approach is to determine the suitability of this process for other  
45 priority areas, for example, tobacco control or the drug and alcohol areas. Determining the  
46 suitability for this method for duplication and translation for these other areas and development of  
47 protocols is a priority for health services and local government.  
48  
49  
50  
51  
52  
53

#### 54 **Author Contributions**

55  
56 All authors participated in the design of the study. JJ & KB drafted the manuscript, and all authors  
57 read and approved the final manuscript.  
58  
59  
60

**Funding statement**

This project is part of the Healthway Health Promotion Exploratory Research Grants project 31980. East Metropolitan Health Service and Curtin University provided initial seed funding.

**Competing interests**

None.

**Acknowledgements**

The authors would like to thank Cassandra Bordin for her continuous support during the process of this protocol development.

## REFERENCES

1. Australian Institute of Health and Welfare. Healthy Communities: Overweight and obesity rates across Australia, 2014–15. 2016.
2. Kleinert S, Horton R. Rethinking and reframing obesity. *The Lancet*. 2015;385(9985):2326-8.
3. National Health and Medical Research Council. Obesity and Overweight 2015 [cited 2018 18 Jan]. Available from: [www.nhmrc.gov.au/health-topics/obesity-and-overweight](http://www.nhmrc.gov.au/health-topics/obesity-and-overweight).
4. The Australian Prevention Partnership Centre. Building a compelling case for prevention 2017 [cited 2018 22 Jan]. Available from: <http://preventioncentre.org.au/our-work/research-projects/building-a-compelling-case-for-prevention/>.
5. Colagiuri S, Lee CMY, Colagiuri R, Magliano D, Shaw JE, Zimmet PZ, et al. The cost of overweight and obesity in Australia. *The Medical Journal of Australia*. 2010;192(5):260.
6. National Health and Medical Research Council. Obesity and Overweight 2017 [updated 2015]. Available from: <https://www.nhmrc.gov.au/health-topics/obesity-and-overweight>.
7. Ulijaszek S. With the benefit of Foresight: Obesity, complexity and joined-up government. *BioSocieties*. 2015;10(2):213-28.
8. Swinburn B, Dietz W, Kleinert S. A Lancet Commission on obesity. *The Lancet*. 2015;386(10005):1716-7.
9. Allender S, Owen B, Kuhlberg J, Lowe J, Nagorcka-Smith P. A Community Based Systems Diagram of Obesity Causes. *PLoS ONE*. 2015;10(7):e0129683.
10. Friel S, Pescud M, Malbon E, Lee A, Carter R, Greenfield J, et al. Using systems science to understand the determinants of inequities in healthy eating. *PLoS ONE*. 2017;12(11):e0188872.
11. Green L, Sim L, Breiner H. Evaluating Obesity Prevention Efforts: A Plan for Measuring Progress: National Academies Press; 2013. Available from: <https://www.ncbi.nlm.nih.gov/books/NBK202498/>.
12. Rosas SR. Systems thinking and complexity: considerations for health promoting schools. Health Promotion International. 2015.
13. Carey G, Malbon E, Carey N, Joyce A, Crammond B. Systems science and systems thinking for public health: a systematic review of the field. *BMJ Open*. 2015;5(12).
14. Peters D. The application of systems thinking in health: why use systems thinking? *Health Research Policy and Systems*. 2014;12(1):51.
15. Mabry PL, Marcus SE, Clark PI, Leischow SJ, Méndez D. Systems science: A revolution in public health policy research. *American Journal of Public Health*. 2010;100(7):1161-3.
16. Luke DA, Stamatakis KA. Systems science methods in public health: Dynamics, networks, and agents. *Annual Review of Public Health*. 2012;33:357-76.
17. Adam T. Advancing the application of systems thinking in health. *Health Research Policy and Systems*. 2014;12(1):50.
18. Chronic Disease Prevention Directorate. Western Australian Health Promotion Strategic Framework 2017–2021. In: Department of Health Western Australia, editor. Perth, Western Australia 2017.
19. The Australian Prevention Partnership Centre. Strengthening the system: A partnership approach to chronic disease prevention. Haymarket, NSW: Sax Institute, 2016.
20. Cleland V, McNeilly B, Crawford D, Ball K. Obesity prevention programs and policies: Practitioner and policy- maker perceptions of feasibility and effectiveness. *Obesity*. 2013;21(9):E448-E55.
21. Aicken C, Roberts H, Arai L. Mapping service activity: the example of childhood obesity schemes in England. *BMC Public Health*. 2010;10(1):310.
22. Nichols MS, Reynolds RC, Waters E, Gill T, King L, Swinburn BA, et al. Community-based efforts to prevent obesity: Australia-wide survey of projects. *Health Promotion Journal of Australia*. 2013;24(2):111-7.

23. The Australian Prevention Partnership Centre. Prevention Tracker: Learning locally to act nationally 2015. Available from: <https://preventioncentre.org.au/our-work/research-projects/prevention-tracker-learning-locally-to-act-nationally/>.
24. The Australian Prevention Partnership Centre. Learning from local communities: Prevention Tracker expands 2016 [18/10/2018]. Available from: <https://preventioncentre.org.au/our-work/research-projects/learning-from-local-communities-prevention-tracker-expands/>.
25. Biernacki P, Waldorf D. Snowball sampling: Problems and techniques of chain referral sampling. *Sociological Methods & Research*. 1981;10(2):141-63.
26. Australian Health Practitioner Regulation Agency. Registration: Codes and guidelines 2018. Available from: <https://www.ahpra.gov.au/Registration/Registration-Standards/codes-guidelines.aspx>.
27. Corp. I. IBM SPSS Statistics for Windows, Version 25.0. Arnmork, NY: IMB Corp. ; 2017.
28. PARTNER Tool. Program to Analyze, Record, and Track Networks to Enhance Relationships 2012 [cited 2018 08 Feb,]. Available from: <http://www.partnertool.net>.
29. Milward HB, Provan KG. Measuring Network Structure. *Public Administration*. 1998;76(2):387-407.
30. Qualtrics. Qualtrics. Provo, Utah, USA2018.
31. Kothari A, Hamel N, MacDonald J, Meyer M, Cohen B, Bonnenfant D. Exploring community collaborations: Social network analysis as a reflective tool for public health. *Syst Pract Action Res*. 2014;27:123-37.
32. Hawe P, Webster C, Shiell A. A glossary of terms for navigating the field of social network analysis. *Journal of Epidemiology and Community Health*. 2004;58(12):971.
33. Borgatti S, Everett M, Freeman L. Ucinet for Windows: Software for social network analysis. Harvard: Analytic Technologies; 2002.
34. Borgatti S. NetDraw: Graph visualization software. Harv Analytic Technologies; 2002.
35. Home Office. Social Network Analysis: 'How to guide'. 2016.
36. Freeman L. Centrality in social networks: a conceptual clarification. *Soc Netw*. 1979;1:215-39.
37. Brownson RC, Colditz GA, Proctor EK. Dissemination and implementation research in health : translating science to practice / edited by Ross C. Brownson, Graham A. Colditz, Enola K. Proctor. Oxford ; New York: Oxford ; New York : Oxford University Press; 2012.

# BMJ Open

## Exploring network structure and the role of key stakeholders to understand the obesity prevention system in an Australian metropolitan health service: study protocol

|                                 |                                                                                                                                                                                                                                                                                                                                                                                                                                                                                                                                                                                                                                                                                                                                                                                                                                                                                              |
|---------------------------------|----------------------------------------------------------------------------------------------------------------------------------------------------------------------------------------------------------------------------------------------------------------------------------------------------------------------------------------------------------------------------------------------------------------------------------------------------------------------------------------------------------------------------------------------------------------------------------------------------------------------------------------------------------------------------------------------------------------------------------------------------------------------------------------------------------------------------------------------------------------------------------------------|
| Journal:                        | <i>BMJ Open</i>                                                                                                                                                                                                                                                                                                                                                                                                                                                                                                                                                                                                                                                                                                                                                                                                                                                                              |
| Manuscript ID                   | bmjopen-2018-027948.R1                                                                                                                                                                                                                                                                                                                                                                                                                                                                                                                                                                                                                                                                                                                                                                                                                                                                       |
| Article Type:                   | Protocol                                                                                                                                                                                                                                                                                                                                                                                                                                                                                                                                                                                                                                                                                                                                                                                                                                                                                     |
| Date Submitted by the Author:   | 21-Mar-2019                                                                                                                                                                                                                                                                                                                                                                                                                                                                                                                                                                                                                                                                                                                                                                                                                                                                                  |
| Complete List of Authors:       | Jancey, Jonine; Curtin University, School of Public Health; Curtin University, Collaboration for Evidence, Research and Impact in Public Health<br>Leavy, Justine ; Curtin University, School of Public Health; Curtin University, Collaboration for Evidence, Research and Impact in Public Health<br>Pollard, Christina; East Metropolitan Health Service<br>Riley, Therese; Sax Institute, The Australian Prevention Partnership Centre<br>Szybiak, Maria; Cancer Council Western Australia; Heart Foundation Western Australia<br>Milligan, Megan; East Metropolitan Health Service<br>Chamberlain, Dan; Sax Institute, The Australian Prevention Partnership Centre; La Trobe University, School of Psychology and Public Health<br>Blackford, Krysten; Curtin University, School of Public Health; Curtin University, Collaboration for Evidence, Research and Impact in Public Health |
| <b>Primary Subject Heading</b>: | Public health                                                                                                                                                                                                                                                                                                                                                                                                                                                                                                                                                                                                                                                                                                                                                                                                                                                                                |
| Secondary Subject Heading:      | Health services research                                                                                                                                                                                                                                                                                                                                                                                                                                                                                                                                                                                                                                                                                                                                                                                                                                                                     |
| Keywords:                       | obesity prevention, systems thinking, health promotion, social network analysis, Organisation of health services < HEALTH SERVICES ADMINISTRATION & MANAGEMENT                                                                                                                                                                                                                                                                                                                                                                                                                                                                                                                                                                                                                                                                                                                               |
|                                 |                                                                                                                                                                                                                                                                                                                                                                                                                                                                                                                                                                                                                                                                                                                                                                                                                                                                                              |

SCHOLARONE™  
Manuscripts

1  
2  
3 **Title:** Exploring network structure and the role of key stakeholders to understand the obesity  
4 prevention system in an Australian metropolitan health service: study protocol.  
5  
6  
7

8 **Authors:** Jonine Jancey<sup>1,2</sup>, Justine E Leavy<sup>1,2</sup>, Christina Pollard<sup>3</sup>, Therese Riley<sup>4</sup>, Maria Szybiak<sup>5,6</sup>,  
9 Megan Milligan<sup>3</sup>, Dan Chamberlain<sup>4,7</sup>, Krysten Blackford<sup>1,2\*</sup>  
10  
11

12  
13 \*Corresponding author: Krysten Blackford, GPO Box U1987, Perth WA 6845,  
14

15 [k.blackford@curtin.edu.au](mailto:k.blackford@curtin.edu.au), +61892662751  
16

- 17 1. School of Public Health, Curtin University, Perth, Australia.
- 18 2. Collaboration for Evidence, Research and Impact in Public Health, Curtin University, Perth,  
19 Australia.
- 20 3. East Metropolitan Health Service, Perth, Australia.
- 21 4. The Australian Prevention Partnership Centre, Sax Institute, Haymarket, Australia.
- 22 5. Heart Foundation Western Australia, Subiaco, Australia.
- 23 6. Cancer Council Western Australia, Subiaco, Australia.
- 24 7. School of Psychology and Public Health, La Trobe University, Melbourne  
25  
26  
27  
28  
29

30  
31 **Word count:** 2,643  
32  
33  
34  
35  
36  
37  
38  
39  
40  
41  
42  
43  
44  
45  
46  
47  
48  
49  
50  
51  
52  
53  
54  
55  
56  
57  
58  
59  
60

## ABSTRACT

### Introduction

Little progress has been made to address the increasing obesity prevalence over the past few decades, and there is growing concern about the far-reaching consequences for health and wellbeing related to obesity on a global scale. Systems thinking is emerging as a suitable approach for obesity prevention, as it allows health researchers, practitioners and policy-makers to systematically synthesise existing data, expose gaps, inform priority setting, and identify leverage points in the system. The aim of this study is to trial a systems thinking approach to better understand the local obesity prevention system, and identify gaps and viable opportunities for health promotion activities to strengthen obesity prevention efforts in an Australian metropolitan health service.

### Methods and analysis

A mixed methods design will be undertaken in a metropolitan health service area in Perth, Western Australia in 2019-20. A systems inventory audit will be used to identify physical activity, nutrition and overweight/obesity prevention activities taking place in the study area. An organisational network survey will be administered, and a social network analysis undertaken to examine relationships between organisations in the network. The relationships and interactions will compare the level and type of interactions each organisation has within the network. Parameters including density, centrality and betweenness will be computed using UCINET and Netdraw.

### Ethics and dissemination

Ethics approval has been obtained from the Curtin University Human Research Ethics Committee (approval number HRE2017-0862). Results will be reviewed with members of the Advisory Group, submitted to relevant journals, and presented at relevant conferences to health promotion practitioners and policymakers. The area health service, as co-producers of the research, will use findings to inform policy and strategy across the study area.

### Keywords

Obesity prevention; systems thinking; health promotion; social network analysis

**ARTICLE SUMMARY****Strengths and limitations of this study**

- The research will identify obesity prevention programs, collaborations and interactions, to help identify gaps in the system and directly inform decision making processes to strengthen obesity prevention efforts.
- The quality of data will depend on the willingness of participants and organisations in the study area to share information.
- De-identification of organisation data may make planning and improvements in the health service area challenging.
- The co-production approach addresses the usual gap between research, policy makers and practitioners' needs, creating timely, real-world outcomes.
- The suitability of this process will be evaluated for duplication and translation into other priority areas for health services and local government (e.g. tobacco control; alcohol harm reduction).

## INTRODUCTION

### Health Issue

The prevalence of obesity is increasing across the globe, and with almost 2 in 3 Australian adults and 1 in 4 Australian children overweight or obese, Australia has some of the highest recorded rates of obesity in the world(1). In 2014–15, approximately 63% of Australian adults were overweight or obese, which is equivalent to approximately 11 million people(2). Little progress has been made addressing the issue over the past few decades, and there is growing concern about the far-reaching consequences for the health and wellbeing of populations(3).

As the prevalence of overweight and obesity increases, health and welfare costs will also increase substantially(4). The financial consequences for the individual and the health care system will adversely impact workplace productivity, participation in the workplace, and economic growth(5). In 2010, the direct costs associated with obesity and associated chronic disease in Australia was calculated to be \$21 billion annually and indirect costs \$35.6 billion, deriving an overall annual cost of \$56.6 billion(6). This ever increasing annual cost further escalates obesity as a public health priority and highlights the need for effective and comprehensive prevention efforts(7).

Obesity is a “complex problem” and innately challenging. Unlike simple problems where outcomes of actions are linear and can be predicted, complex problems involve multiple actors and require multiple interventions that go beyond the focus of personal responsibility(8). Halting and reversing obesity both in Australia and globally will require changing our societal approach to consumption of food, beverages, and physical activity behaviours(3), which are part of complex systems that include food supply, communications, transport, urban design, business, socio-cultural, education, health, trade, economic, governance, urban design, and marketing systems(9). Understanding these complexities has supported the emergence of systems thinking as an obesity prevention approach(10, 11).

### Systems Thinking

To address the problem of obesity, it is imperative to understand the community system in which it occurs, and implement health promotion interventions that involve coordinated interconnected components that consider physical, biological, ecological, social, political and organisational relationships(12). Accordingly, systems thinking recognises the characteristics of these relationships and emphasises the nonlinear, dynamic and adaptive nature of the overall system(13). Systems thinking tools and methods allow researchers and decision-makers to examine a system’s components and levels, which can assist with planning appropriate interventions(14, 15).

1  
2  
3 Systems thinking has been used in other disciplines such as physics, economics, engineering, and  
4 systems biology(16), and has more recently been introduced to the public health field to address a  
5 wide range of health problems(14). A major reason for the recent adoption of systems thinking in  
6 health promotion is the growing recognition of its ability to inform investments and actions that  
7 address complex problems in specific domains (e.g., neighbourhood effects on health and obesity).  
8 Often there are a number of similar programs and activities operating simultaneously within a  
9 community, coordinated and funded by an array of organisations and funding bodies. Therefore, the  
10 systems thinking approach provides health researchers, practitioners and policy-makers with the  
11 tools to systematically synthesise existing data, expose gaps, inform priority setting, and identify  
12 leverage points in the system(16-18).

20  
21 Social network analysis (SNA) is a tool that is commonly used in systems thinking to transform health  
22 practice(19). SNA explores the structures and processes of a network, which may constitute  
23 individuals or organisations (actors) that are linked by ties to one another(20). This type of analysis  
24 focuses on relationships within a network rather than studying the attributes of individuals or  
25 organisations that comprise the network(20). It can identify what ties actors have and whether they  
26 are informal (e.g. an organisation is known to another organisation), or formal (e.g. funding or joint-  
27 partnership of service delivery)(21). Understanding the types and functions of networks(21) and  
28 what role key actors play is essential to understand if, where, and how to intervene in a system.

### 35 **Western Australian Context**

36  
37 The Western Australian (WA) Health Promotion Strategic Framework(22) is a State Government  
38 framework that adopts a whole-of-population approach to addressing obesity, with identified  
39 targeted interventions aimed at reducing health inequalities in communities who have a high  
40 prevalence of the associated chronic disease risk factors. The WA Department of Health has  
41 developed a five-year plan to curb the rise of overweight and obesity in the WA population and has  
42 highlighted the need for interventions to take a comprehensive approach to prevention(22). In  
43 support of this comprehensive approach, a large and newly formed government Health Service in  
44 metropolitan Perth WA has been established, which is an extensive hospital and health service  
45 network that aims to maintain and improve the health and wellbeing of more than 708,000 residents  
46 in its catchment area across 13 local government areas.

54  
55 There is dearth of information regarding the organisations and networks that operate within the  
56 area health service that address obesity, physical activity and nutrition to improve long term health  
57 outcomes. Using a collaborative approach and systems thinking informed methods previously  
58 trialled in a range of communities across Australia(23), a partnership between a university, non-  
59  
60

1  
2  
3 government organisation and government department was established to undertake this project.  
4  
5 This collaborative research aims to better understand the obesity prevention system located in a  
6  
7 metropolitan area of WA. This exploratory research will use a systems thinking approach to better  
8  
9 understand the local obesity prevention system defined by the geographic catchment of an area  
10  
11 health service; and identify potential gaps and viable opportunities for health promotion  
12  
13 investments that will improve obesity prevention efforts and actions.

## 14 **METHODS AND ANALYSIS**

15  
16 This mixed methods study, which uses systems thinking tools, will be conducted in 2019-20 and  
17  
18 comprises three phases. It will explore the boundaries, networks and actions of the local obesity  
19  
20 prevention system in the study area, which includes the thirteen Local Government Areas (LGAs)  
21  
22 that comprise the area health service. The study design is based on previous studies(24-26) and  
23  
24 methods undertaken in Australia(23, 27-29); and makes use of The Systems Change Framework(30)  
25  
26 and its iterative inquiry process involving four stages: 1) define the situation; 2) gain clarity; 3) find  
27  
28 leverage; and 4) act strategically. These key elements will enable a deeper understanding of the  
29  
30 obesity prevention system in the study area. This type of inquiry involves an ongoing process of  
31  
32 interrogation to shift from the current undesirable state to a future desirable state.

### 31 **Primary aim**

32  
33 This exploratory research will use a systems thinking approach to better understand the local obesity  
34  
35 prevention system defined by the geographic catchment of an area health service; and identify  
36  
37 potential gaps and viable opportunities for health promotion investments that will improve obesity  
38  
39 prevention efforts and actions.

### 40 **Research objectives**

- 41  
42 • Profile the chronic disease and health risks relevant to overweight/obesity for the study  
43  
44 population (Phase 1).
- 45  
46 • Explore local physical activity, nutrition and overweight/obesity prevention activities taking  
47  
48 place in the study area (Phase 2).
- 49  
50 • Identify the most influential stakeholders, collaborations and activities within the study area  
51  
52 (Phase 3).
- 53  
54 • Identify opportunities to support these actions or make system improvements (Phase 4).
- 55

### 56 **Advisory Group**

57  
58 An Advisory Group comprising the Research Team and selected experts in obesity prevention will be  
59  
60 formed in the early stages of the project. The Research Team will identify and invite experts to join

1  
2  
3 the Advisory Group who have relevant experience in health promotion policy and practice, including  
4 relevant stakeholders and practitioners with current expertise in non-government organisations,  
5 local government, and Aboriginal and Torres Strait Islander issues. The group will meet on a  
6 quarterly basis for two years to identify relevant stakeholders and potential collaborators; review  
7 research instruments as required; consider findings and provide feedback; and make  
8 recommendations for research translation.  
9  
10  
11  
12

### 13 **Phase 1: LGA profiling**

#### 14 *Aim*

15 To describe the context of the study area by identifying the preventable risk factors for  
16 overweight/obesity, and prevalence of associated chronic diseases (such as type 2 diabetes mellitus,  
17 cardiovascular disease and some cancers) for each LGA in the study area. All population groups will  
18 be included in the summary.  
19  
20  
21  
22  
23

#### 24 *Method*

25 This phase is based on the Prevention Tracker community snapshot method(27) and relates to stage  
26 one of the iterative inquiry process of The Systems Change Framework(30) whereby enabling factors  
27 and initial boundaries for the systemic inquiry are identified. Micro- (behavioural) and meso-  
28 (institutional) obesity risk factors will be explored(31), specifically poor nutrition, inadequate physical  
29 activity and excess body weight. The Research Team and Advisory Group will outline the scope and  
30 nature of the health profiles of the 13 LGAs. The Health Services health promotion team will develop  
31 a set of health indicators which will be collated from Departmental monitoring systems and other  
32 sources. All data will be provided to the Advisory Group and Research Team for use in Phase 2.  
33  
34  
35  
36  
37  
38  
39

### 40 **Phase 2: System Inventory**

#### 41 *Aim*

42 To identify current physical activity, nutrition and overweight/obesity prevention activities taking  
43 place in the study area. These data will be used to refine the approach to Phase 3.  
44  
45  
46  
47

#### 48 *Method*

49 This phase also relates to stage one of the iterative inquiry process of The Systems Change  
50 Framework(30) and will be used to identify factors to facilitate systems change efforts. The System  
51 Inventory method(28) will be adapted by the Research Team for the study area. The inventory will  
52 capture a comprehensive list of the key organisations that contribute to prevention efforts across  
53 the study area.  
54  
55  
56  
57

#### 58 *Participants and sampling*

1  
2  
3 Participants will include health promotion practitioners, policy makers and other health  
4 professionals involved in the delivery of physical activity, nutrition and obesity prevention programs  
5 and activities in the study area. The Advisory Group and Health Promotion Officers employed by the  
6 area health service will use Nominal Group Technique(32) to reach consensus on the key  
7 organisations and individuals to be interviewed initially, based on the inclusion/exclusion criteria  
8 outlined below. All potential organisations will be sent a letter inviting them to participate in a face-  
9 to-face interview with two Health Promotion Officers. Interested participants will be provided with a  
10 study information sheet, and informed written consent will be obtained prior to the interview  
11 commencing. To ensure that all relevant individuals are included, a referral sampling technique will  
12 be used whereby participants can nominate other relevant stakeholders and individuals involved in  
13 physical activity, nutrition or obesity prevention in the study area(33).  
14  
15  
16  
17  
18  
19  
20  
21

### 22 *Data collection*

23 A custom-built database will be designed using Microsoft Access software to record details of  
24 prevention activities being employed in the study area. The content of the database will be based on  
25 the Systems Inventory instrument(28), and the database will be reviewed by the Research Team to  
26 confirm face and content validity. It will then be trialled with health professionals (n=10) and  
27 changes made as required. The Health Promotion Officers (n=6) will then review and trial the final  
28 instrument for usability, suitability and comprehension. Training workshops for the Health  
29 Promotion Officers on data collection and use of the database will be conducted in conjunction with  
30 the instrument trial.  
31  
32  
33  
34  
35  
36  
37

38 The database will capture information for each activity/program delivered by participants and the  
39 organisations they represent. The inventory will include information on the: organisation type;  
40 contact information; overarching program objectives and strategies; types of activities implemented  
41 (physical activity, nutrition, and obesity prevention); activity duration; collaborating partners; target  
42 population; settings/locations the program/activity operates; program evaluation; and program  
43 funding details. Activities will be included in the system inventory if they are: a) a current  
44 intervention strategy (policy/regulation or program); b) conducted in or reach the study area; c)  
45 comprise more than one activity session to indicate an ongoing nature; d) population- or community-  
46 based; and e) aimed at obesity prevention, specifically nutrition, physical activity, and/or  
47 overweight/obesity prevention. Activities will be excluded if they are: a) delivered by alternative  
48 therapists based on Australian Health Practitioner Regulation Agency(34) guidelines; b)  
49 pharmacological interventions (special purpose dietary supplements); c) one-on-one  
50 interventions/practitioners delivering individually focused programs; and d) not comprising a core  
51 component (at least 75%) focusing on nutrition, physical activity, or overweight/obesity prevention.  
52  
53  
54  
55  
56  
57  
58  
59  
60

1  
2  
3 These data items will collectively make up the inventory of obesity prevention activities in the study  
4 area.  
5

#### 6 7 *Data analysis*

8 Descriptive statistics will be used to summarise the Systems Inventory data for the study area. All  
9 statistical analyses will be performed using SPSS Statistics Package 25(35). Results will inform Phase  
10  
11 3.  
12  
13

### 14 **Phase 3: Organisational network survey**

#### 15 16 *Aim*

17 To identify the most influential stakeholders undertaking obesity prevention activities within the  
18 study area, examine the relationships between them, and identify potential system improvements.  
19  
20

#### 21 22 *Method*

23 This phase relates to stages two and three of the iterative inquiry process of The Systems Change  
24 Framework(30) and will support a deeper understanding of the system in terms of perspectives,  
25 relationships and boundaries; and find leverage by exploring opportunities for engaging in the  
26 system. An online organisational network survey will be undertaken to assess the degree of  
27 interrelatedness between a sub-sample of organisations identified during Phase 2. The survey has  
28 been previously developed and trialled(36, 37) and will be adapted for the current context.  
29 Relationships and interactions between the organisations will be captured via quantitative methods  
30 and analysed to provide a visual representation of the network structure in terms of interactions,  
31 activities and collaborations between organisations within the system.  
32  
33  
34  
35  
36  
37  
38

#### 39 40 *Participants and sampling*

41 Key decision-makers from a range of organisations will be sampled from the inventory produced  
42 during Phase 2. Based on previous studies(29), the Research Team will identify the top 30  
43 organisations nominated during the Systems Inventory. This will support achieving the required  
44 response rate of 75% for the network data to be considered reliable(38). Researchers will initially  
45 make telephone contact with the identified stakeholders to inform them of the research aim, and  
46 participants will be provided with a link to the survey. Participants will provide informed consent  
47 prior to commencing the survey. If there has been no response after one week, researchers will  
48 follow-up via telephone and offer assistance to complete the survey.  
49  
50  
51  
52  
53

#### 54 55 *Data collection*

56 Data will be collected via an online survey using Qualtrics(39). Participants will be asked to identify  
57 the organisations with which they share information, knowledge, or resources; engage in joint  
58  
59  
60

1  
2  
3 planning; apply for joint funding; and share informal contacts. Participants will be asked to choose  
4 from a compiled list of organisations, and will have the opportunity to expand on their responses  
5 using open-ended textboxes.  
6  
7

#### 8 9 *Data analysis*

10 Data will be analysed using social network analysis (SNA), which explores social phenomena through  
11 analysis of a network's structure. Data will be mapped and analysed using UCINET 6 for Windows(40)  
12 and Netdraw software(41). Links between organisations will be mapped visually as a network graph,  
13 and the analysis will examine the role of organisations in the network relative to others by plotting  
14 the centrality scores. Core-periphery analysis will be conducted to identify densely connected core-  
15 nodes and sparsely connected periphery-nodes(42). Central organisations will be identified by  
16 degree centrality (most connected within the network), closeness centrality (connecting quickly to  
17 the whole network), and betweenness centrality (strategically placed in the network)(43, 44).  
18

19 Organisation characteristics will also be used to determine the basis of clustering. This will enable  
20 the identification of potential organisational collaborations, and gaps in the service delivery system  
21 across the study area. Nodes will be de-identified for presentation. The data will be available on  
22 contact when the researchers have agreed analysis is complete.  
23  
24

#### 25 26 27 28 29 30 31 **Phase 4: System improvements**

32 At the completion of Phase 3, The Systems Change Framework(30) will be revisited to complete the  
33 final stage of the iterative inquiry process. The purpose of this stage will be to respond to emerging  
34 system dynamics and engage in planning to address any gaps in the obesity prevention system.  
35  
36

#### 37 38 39 **Patient and public involvement**

40 No patients were directly involved in setting the research question or the design of the study.  
41 Community representation has been obtained via the Advisory Group, which provided guidance on  
42 study design.  
43  
44

#### 45 46 47 **ETHICS AND DISSEMINATION**

48 Ethics approval has been obtained from the Curtin University Human Research Ethics Committee  
49 (Approval Number HREC2017-0862). Participants will receive an information sheet stating that all  
50 data collected during each phase of the study will be de-identified and treated as confidential. Data  
51 will be password protected and saved to a secure server. A coordinated knowledge exchange via the  
52 Advisory Group and research agencies will be undertaken as part of the dissemination strategy. The  
53 research plan utilises push / pull knowledge exchange strategies to clearly describe how the findings  
54 are promoted and used. Push/pull knowledge translation in public health refers to the dissemination  
55 efforts by researchers (push) and the potential for limitation in its momentum by policymaker and  
56  
57  
58  
59  
60

1  
2  
3 practitioner motivation and capability (pull)(45). The push-pull framework will be used to guide  
4 community engagement and appropriate dissemination as outlined below.  
5  
6

#### 7 *Push strategy*

8 It is intended that policy and action briefs for relevant stakeholders will be developed in partnership  
9 with the Advisory Group to provide an overview of the project, process findings and  
10 recommendations at the completion of each phase. Targeted presentations and skill building  
11 activities will be brokered; for example, stakeholder workshops to discuss findings, the delivery of  
12 agency-related conference presentations. Key findings will be prepared for dissemination and  
13 communicated appropriately to relevant stakeholders in government, non-government and  
14 community organisations. This may include using agency-specific communication methods through  
15 newsletters, social media, online and website advertising and content, as well as seminars as  
16 appropriate. Peer reviewed journal articles and fact sheets will be made available to build the  
17 capacity of the professional workforce in health, public health, government and non-government  
18 agencies, as well as the broader general community. Research reports will be made available  
19 through the research organisation websites, and potential replication and duplication of processes  
20 and uptake of findings will be supported.  
21  
22  
23  
24  
25  
26  
27  
28  
29

#### 30 *Pull strategy*

31 A key strength of the program design is the utilisation of knowledge brokers (stakeholder managers  
32 and researchers) and program champions (health promotion officers, local government staff and/or  
33 other relevant stakeholders) which will help build capacity in the professional workforce for the  
34 purpose, use and implementation of systems thinking tools and processes in the Perth metropolitan  
35 area, Western Australia. Although this current research focuses on the priority areas of nutrition,  
36 physical activity and overweight/obesity prevention, one of the aims of undertaking a prevention  
37 systems thinking approach is to determine the suitability of this process for other priority areas, such  
38 as, tobacco control or the drug and alcohol use. Determining the suitability of the current research  
39 methods for duplication and translation for other areas is a priority for health services and local  
40 government.  
41  
42  
43  
44  
45  
46  
47  
48  
49

#### 50 **Author Contributions**

51 JJ, JL, CP, TR, MS, MM, DC & KB participated in the design of the study and data collection  
52 instruments. JJ & KB drafted the manuscript, and JJ, JL, CP, TR, MS, MM, DC & KB read and approved  
53 the final manuscript.  
54  
55  
56

#### 57 **Funding statement**

1  
2  
3 This project is part of the Healthway Health Promotion Exploratory Research Grants project 31980.  
4 East Metropolitan Health Service and Curtin University provided initial seed funding. The Prevention  
5 Tracker project was funded by the NHMRC, Australian Government Department of Health, NSW  
6 Ministry of Health, ACT Health and the HCF Research Foundation.  
7  
8  
9

### 10 **Competing interests**

11 None.  
12  
13

### 14 **Acknowledgements**

15 The authors would like to thank Cassandra Bordin for her continuous support during the process of  
16 this protocol development.  
17  
18  
19  
20  
21  
22  
23  
24  
25  
26  
27  
28  
29  
30  
31  
32  
33  
34  
35  
36  
37  
38  
39  
40  
41  
42  
43  
44  
45  
46  
47  
48  
49  
50  
51  
52  
53  
54  
55  
56  
57  
58  
59  
60

## REFERENCES

1. Australian Institute of Health and Welfare. A picture of overweight and obesity in Australia. Cat. no. PHE 216. Canberra: 2017 Contract No.: 978-1-76054-246-7.
2. Australian Institute of Health and Welfare. Healthy Communities: Overweight and obesity rates across Australia, 2014–15. 2016.
3. Kleinert S, Horton R. Rethinking and reframing obesity. *The Lancet*. 2015;385(9985):2326-8.
4. National Health and Medical Research Council. Obesity and Overweight 2015 [cited 2018 18 Jan]. Available from: [www.nhmrc.gov.au/health-topics/obesity-and-overweight](http://www.nhmrc.gov.au/health-topics/obesity-and-overweight).
5. The Australian Prevention Partnership Centre. Building a compelling case for prevention 2017 [cited 2018 22 Jan]. Available from: <http://preventioncentre.org.au/our-work/research-projects/building-a-compelling-case-for-prevention/>.
6. Colagiuri S, Lee CMY, Colagiuri R, Magliano D, Shaw JE, Zimmet PZ, et al. The cost of overweight and obesity in Australia. *The Medical Journal of Australia*. 2010;192(5):260.
7. National Health and Medical Research Council. Obesity and Overweight 2017 [updated 2015]. Available from: <https://www.nhmrc.gov.au/health-topics/obesity-and-overweight>.
8. Ulijaszek S. With the benefit of Foresight: Obesity, complexity and joined-up government. *BioSocieties*. 2015;10(2):213-28.
9. Swinburn B, Dietz W, Kleinert S. A Lancet Commission on obesity. *The Lancet*. 2015;386(10005):1716-7.
10. Allender S, Owen B, Kuhlberg J, Lowe J, Nagorcka-Smith P. A Community Based Systems Diagram of Obesity Causes. *PLoS ONE*. 2015;10(7):e0129683.
11. Friel S, Pescud M, Malbon E, Lee A, Carter R, Greenfield J, et al. Using systems science to understand the determinants of inequities in healthy eating. *PLoS ONE*. 2017;12(11):e0188872.
12. Green L, Sim L, Breiner H. Evaluating Obesity Prevention Efforts: A Plan for Measuring Progress: National Academies Press; 2013. Available from: <https://www.ncbi.nlm.nih.gov/books/NBK202498/>.
13. Rosas SR. Systems thinking and complexity: considerations for health promoting schools. *Health Promotion International*. 2015.
14. Carey G, Malbon E, Carey N, Joyce A, Crammond B. Systems science and systems thinking for public health: a systematic review of the field. *BMJ Open*. 2015;5(12).
15. Peters D. The application of systems thinking in health: why use systems thinking? *Health Research Policy and Systems*. 2014;12(1):51.
16. Mabry PL, Marcus SE, Clark PI, Leischow SJ, Méndez D. Systems science: A revolution in public health policy research. *American Journal of Public Health*. 2010;100(7):1161-3.
17. Luke DA, Stamatakis KA. Systems science methods in public health: Dynamics, networks, and agents. *Annual Review of Public Health*. 2012;33:357-76.
18. Adam T. Advancing the application of systems thinking in health. *Health Research Policy and Systems*. 2014;12(1):50.
19. Swanson R, Cattaneo A, Bradley E, Chunharas S, Atun R, Abbas K, et al. Rethinking health systems strengthening: key systems thinking tools and strategies for transformational change. *Health Policy and Planning*. 2012;27(suppl\_4):iv54-iv61.
20. Kothari A, Hamel N, MacDonald J, Meyer M, Cohen B, Bonnenfant D. Exploring community collaborations: Social network analysis as a reflective tool for public health. *Syst Pract Action Res*. 2014;27:123-37.
21. Hawe P, Webster C, Shiell A. A glossary of terms for navigating the field of social network analysis. *Journal of Epidemiology and Community Health*. 2004;58(12):971.
22. Chronic Disease Prevention Directorate. Western Australian Health Promotion Strategic Framework 2017–2021. In: Department of Health Western Australia, editor. Perth, Western Australia 2017.
23. The Australian Prevention Partnership Centre. The structure of Prevention Tracker. Sax Institute, 2018.

- 1
- 2
- 3
- 4 24. Cleland V, McNeilly B, Crawford D, Ball K. Obesity prevention programs and policies:  
5 Practitioner and policy- maker perceptions of feasibility and effectiveness. *Obesity*. 2013;21(9):E448-  
6 E55.
- 7 25. Aicken C, Roberts H, Arai L. Mapping service activity: the example of childhood obesity  
8 schemes in England. *BMC Public Health*. 2010;10(1):310.
- 9 26. Nichols MS, Reynolds RC, Waters E, Gill T, King L, Swinburn BA, et al. Community-based  
10 efforts to prevent obesity: Australia-wide survey of projects. *Health Promotion Journal of Australia*.  
11 2013;24(2):111-7.
- 12 27. The Australian Prevention Partnership Centre. A community snapshot. Sax Institute, 2018.
- 13 28. The Australian Prevention Partnership Centre. System Inventory. Sax Institute, 2018.
- 14 29. The Australian Prevention Partnership Centre. Social network analysis. Sax Institute, 2018.
- 15 30. Davidson S, Morgan M. Systems Change Framework. Hobart: Sax Institute, 2018.
- 16 31. Richter M, Dragano N. Micro, macro, but what about meso? The institutional context of  
17 health inequalities. *International Journal of Public Health*. 2018;63(2):163-4.
- 18 32. Lee-Han H, Dwyer J, Johnson I. Application of Nominal Group Technique to evaluate a  
19 community health status report. *The Canadian Journal of Program Evaluation*. 1996;11(1).
- 20 33. Biernacki P, Waldorf D. Snowball sampling: Problems and techniques of chain referral  
21 sampling. *Sociological Methods & Research*. 1981;10(2):141-63.
- 22 34. Australian Health Practitioner Regulation Agency. Registration: Codes and guidelines 2018.  
23 Available from: [https://www.ahpra.gov.au/Registration/Registration-Standards/codes-](https://www.ahpra.gov.au/Registration/Registration-Standards/codes-guidelines.aspx)  
24 [guidelines.aspx](https://www.ahpra.gov.au/Registration/Registration-Standards/codes-guidelines.aspx).
- 25 35. Corp. I. IBM SPSS Statistics for Windows, Version 25.0. Arnmork, NY: IMB Corp. ; 2017.
- 26 36. PARTNER Tool. Program to Analyze, Record, and Track Networks to Enhance Relationships  
27 2012 [cited 2018 08 Feb,]. Available from: <http://www.partnertool.net>.
- 28 37. Milward HB, Provan KG. Measuring Network Structure. *Public Administration*.  
29 1998;76(2):387-407.
- 30 38. Borgatti S, Carley K, Krackhardt D. On the robustness of centrality measures under  
31 conditions of imperfect data. *Social Networks*. 2006;28(2):124-36.
- 32 39. Qualtrics. Qualtrics. Provo, Utah, USA2018.
- 33 40. Borgatti S, Everett M, Freeman L. Ucinet for Windows: Software for social network analysis.  
34 Harvard: Analytic Technologies; 2002.
- 35 41. Borgatti S. NetDraw: Graph visualization software. Harv Analytic Technologies; 2002.
- 36 42. Rombach M, Porter M, Fowler J, Mucha P. Core-periphery structure in a network. *SIAM*  
37 *Journal on Applied Mathematics*. 2013;74(1):167-90.
- 38 43. Home Office. Social Network Analysis: 'How to guide'. 2016.
- 39 44. Freeman L. Centrality in social networks: a conceptual clarification. *Soc Netw*. 1979;1:215-  
40 39.
- 41 45. Brownson RC, Colditz GA, Proctor EK. Dissemination and implementation research in health :  
42 translating science to practice / edited by Ross C. Brownson, Graham A. Colditz, Enola K. Proctor.  
43 Oxford ; New York: Oxford ; New York : Oxford University Press; 2012.
- 44
- 45
- 46
- 47
- 48
- 49
- 50
- 51
- 52
- 53
- 54
- 55
- 56
- 57
- 58
- 59
- 60
